# Supplementary material for: DOX sensitized upconversion metal–organic frameworks for the pH responsive release and real-time detection of doxorubicin hydrochloride
Source: Royal Society of Chemistry journal article supplement (doi:10.1039/d0ra06417c), 2020-01-01
Supplement: d0ra06417c1.pdf [file d0ra06417c1.pdf]

# DOX Sensitized upconversion Metal Organic Frameworks for pH Release and Real Time Detection of Doxorubicin Hydrochloride

Feng Tian, Chen Xu, Mingyue Xu, Haiqing Gao, Ziyi Xiao, Yingxi Wang, Ling Li\*

## Content

Figure S1 TEM of La/Tm-MOFs S-1

Figure S2 EDX elemental mapping of La/Tm-MOFs@d-SiO<sub>2</sub> S-2

Figure S3 Mechanism of DOX sensitized upconverted fluorescence of La/Tm-MOFs@d-SiO<sub>2</sub> S-3

Figure S4 Size of DOX at different condition S-4

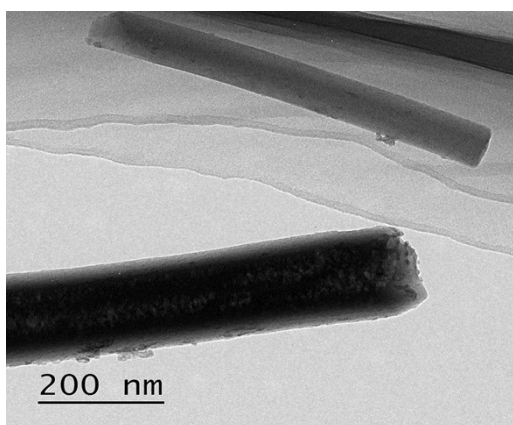

**Figure S1** TEM of La/Tm-MOFs

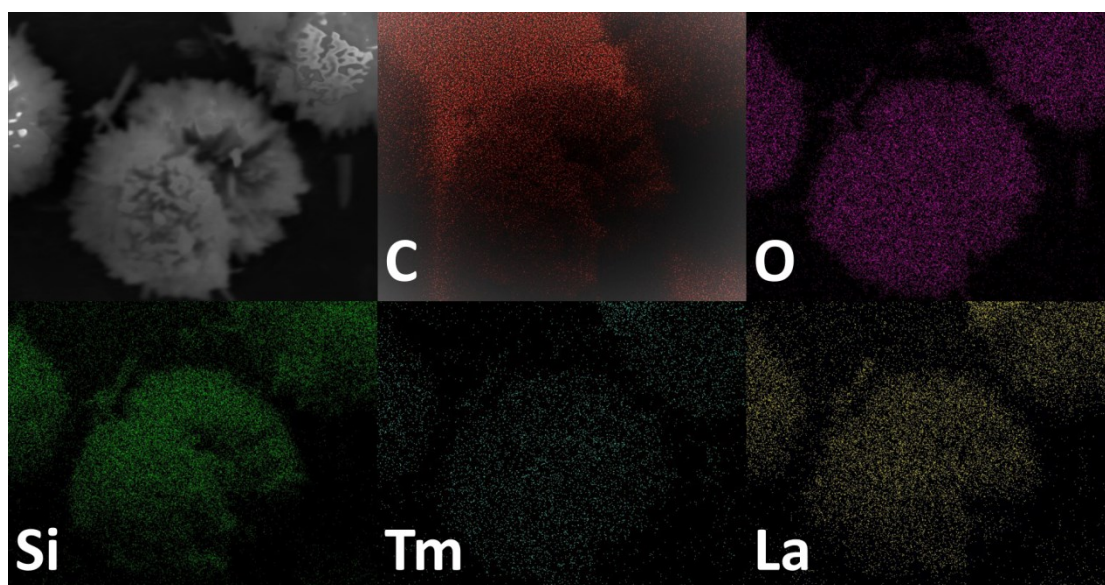

**Figure S2** EDX elemental mapping of La/Tm-MOFs@d-SiO<sub>2</sub>

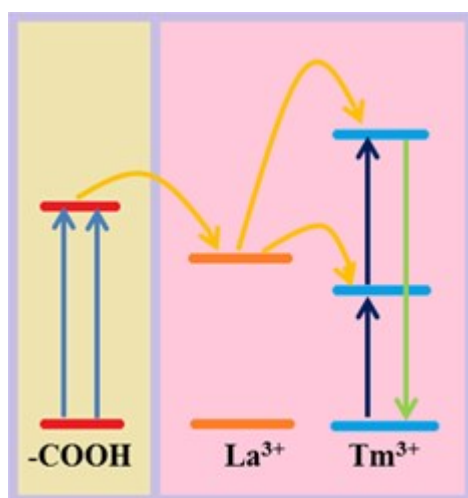

**Figure S3** Mechanism of DOX sensitized upconverted fluorescence of La/Tm-MOFs@d-SiO<sub>2</sub>

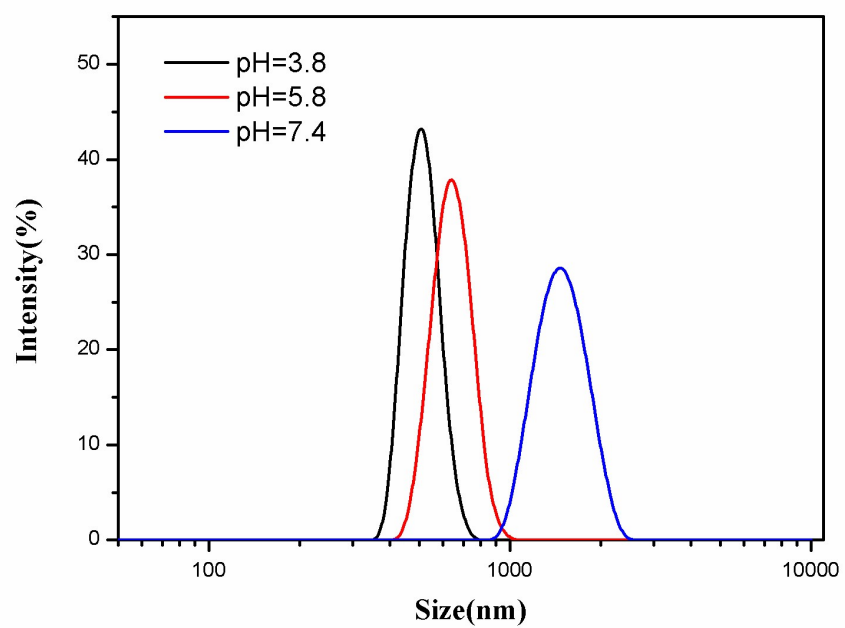

**Figure S4** Size of DOX at different condition
